# Supplementary material for: Double-metal cyanide as an acid and hydrogenation catalyst for the highly selective ring-rearrangement of biomass-derived furfuryl alcohol to cyclopentenone compounds
Source: Royal Society of Chemistry journal article supplement (doi:10.1039/c9gc04432a), 2020-01-01
Supplement: c9gc04432a1.pdf [file c9gc04432a1.pdf]

**Double-metal cyanide as an acid and hydrogenation catalyst for the highly selective ring-rearrangement of biomass-derived furfuryl alcohol to cyclopentenone compounds**

Xiang Li,<sup>a</sup> Qiang Deng,<sup>\*a</sup> Lian Yu,<sup>a</sup> Rui Gao,<sup>a</sup> Zhikun Tong,<sup>a</sup> Chenxi Lu,<sup>b</sup> Jun Wang,<sup>a</sup> Zheling Zeng,<sup>a</sup> Ji-Jun Zou,<sup>c</sup> and Shuguang Deng<sup>\*b</sup>

*a Key Laboratory of Poyang Lake Environment and Resource Utilization (Nanchang University) of Ministry of Education, School of Resource, Environmental and Chemical Engineering, Nanchang University, No. 999 Xuefu Avenue, Nanchang 330031, PR China*

*b School for Engineering of Matter, Transport and Energy, Arizona State University, 551 E. Tyler Mall, Tempe, AZ 85287, USA*

*c Key Laboratory for Green Chemical Technology of the Ministry of education, School of Chemical Engineering and Technology, Tianjin University; Collaborative Innovative Center of Chemical Science and Engineering (Tianjin), No.92 Weijin Road, Tianjin 300072, PR China*

*E-mail: dengqiang@ncu.edu.cn (Qiang Deng); Shuguang.Deng@asu.edu (Shuguang Deng).*

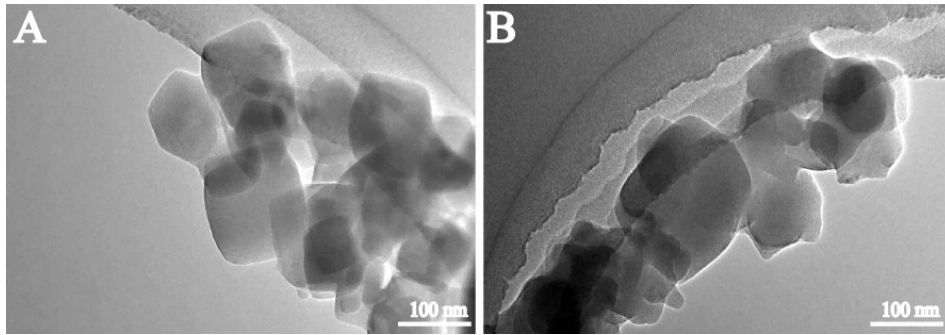

**Figure S1.** TEM micrographs of (A)FeZn, (B) FeZn-P.

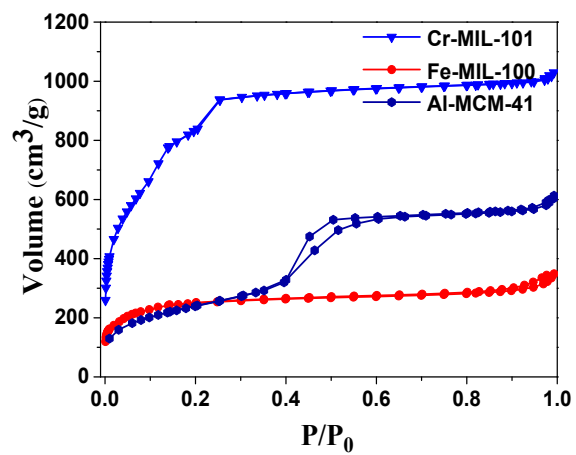

**Figure S2.** N<sub>2</sub> adsorption-desorption isotherms of Cr-MIL-101, Fe-MIL-100, Al-MCM-41.

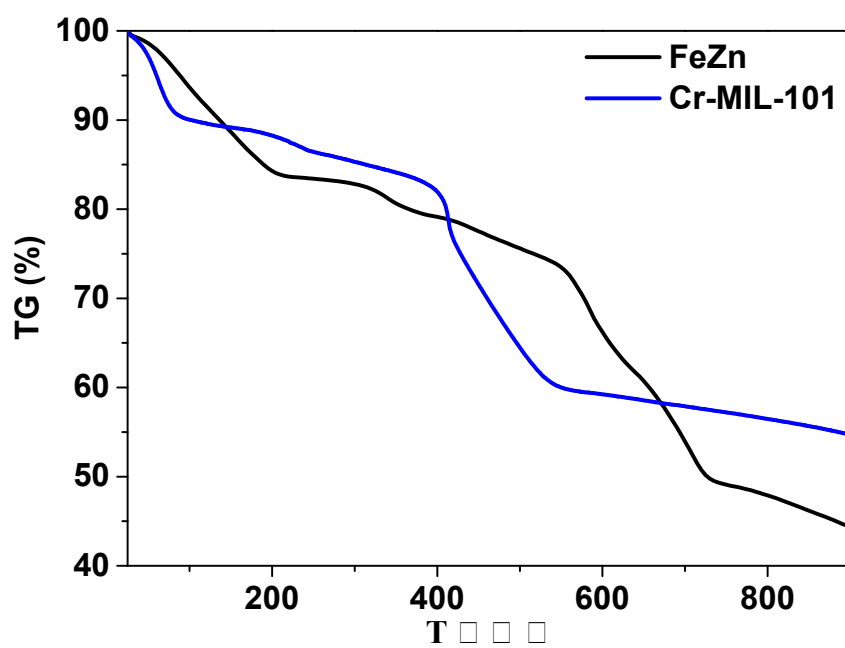

**Figure S3.** Thermal gravimetric analysis profiles of FeZn-DMC and Cr-MIL-101 catalysts.

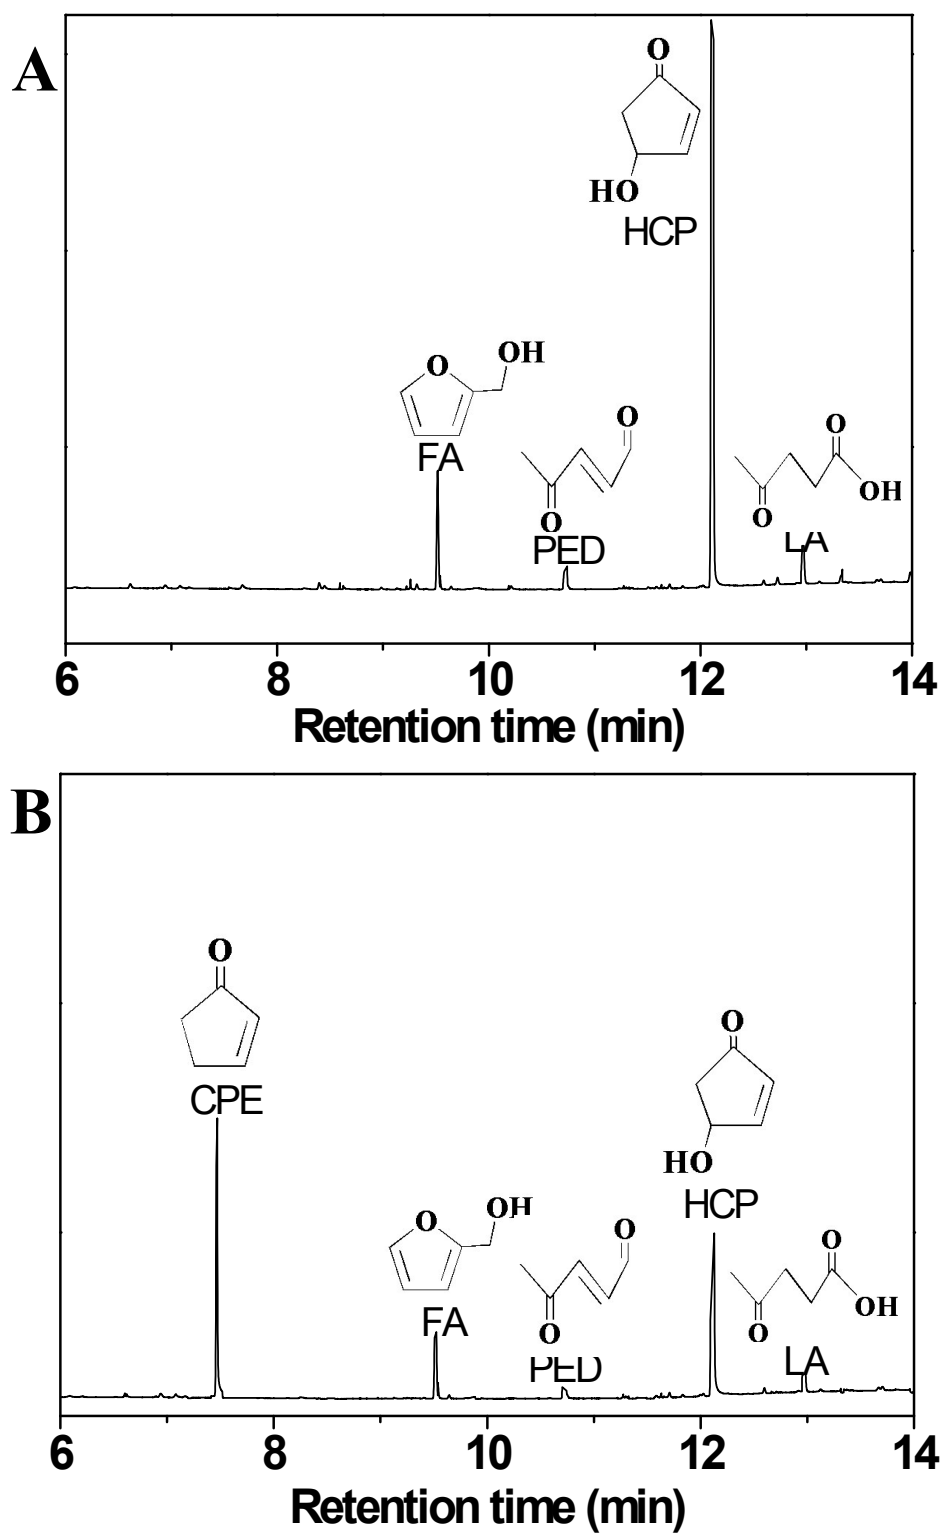

**Figure S4.** GC patterns for the synthesis reactions of (A) 4-hydroxy-2-cyclopentenone (HCP) and (B) 2-cyclopentenone (CPE).

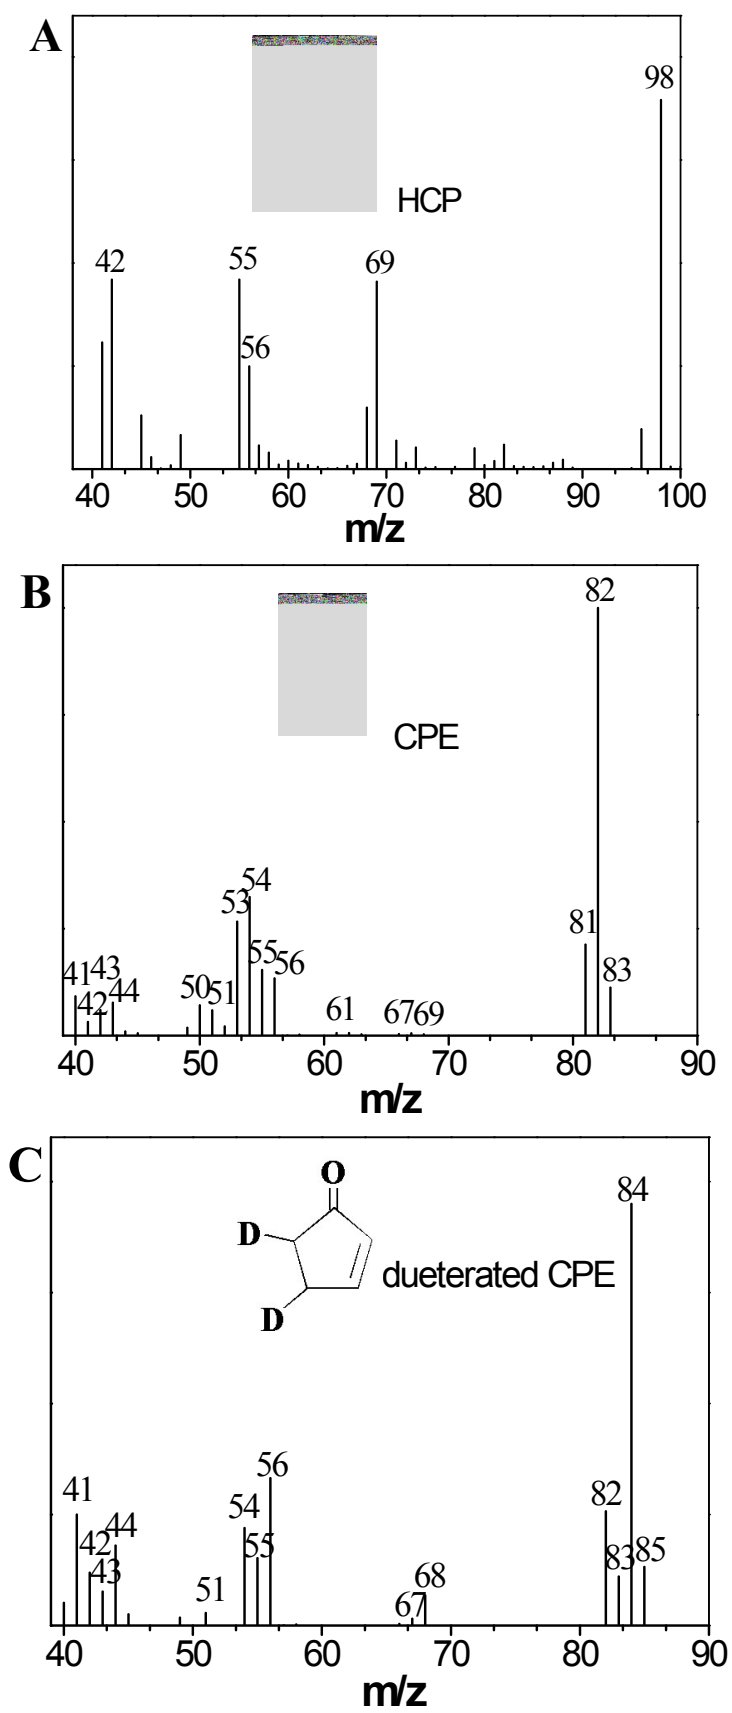

**Figure S5.** MS patterns for (A) HCP, (B) CPE and (C) deuterated CPE.

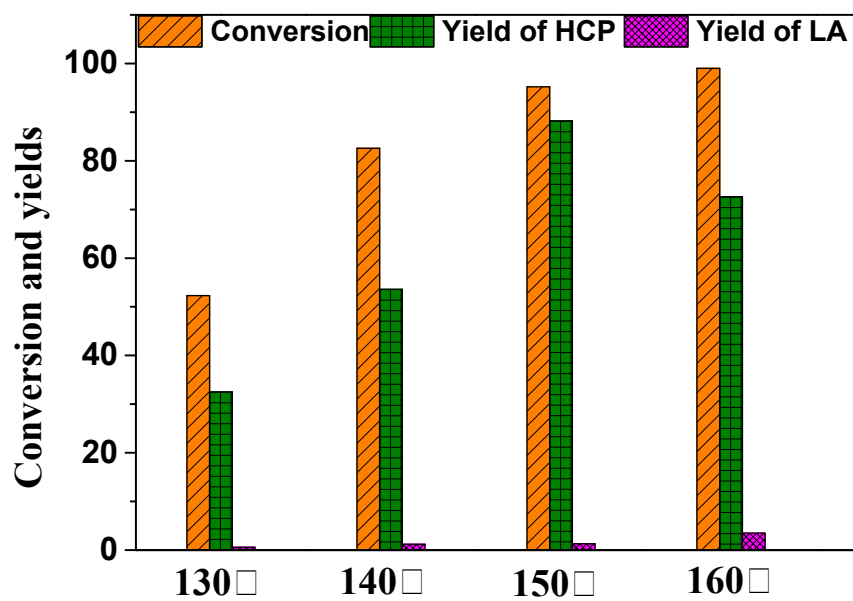

**Figure S6.** Effect of reaction temperature on FA conversion and product yields over FeZn-P. Reaction conditions: FA (10.2 mmol), catalyst 0.1 g, 20 mL water and 20ml n-hexane, 4.0 MPa N<sub>2</sub> pressure, time 6 h.

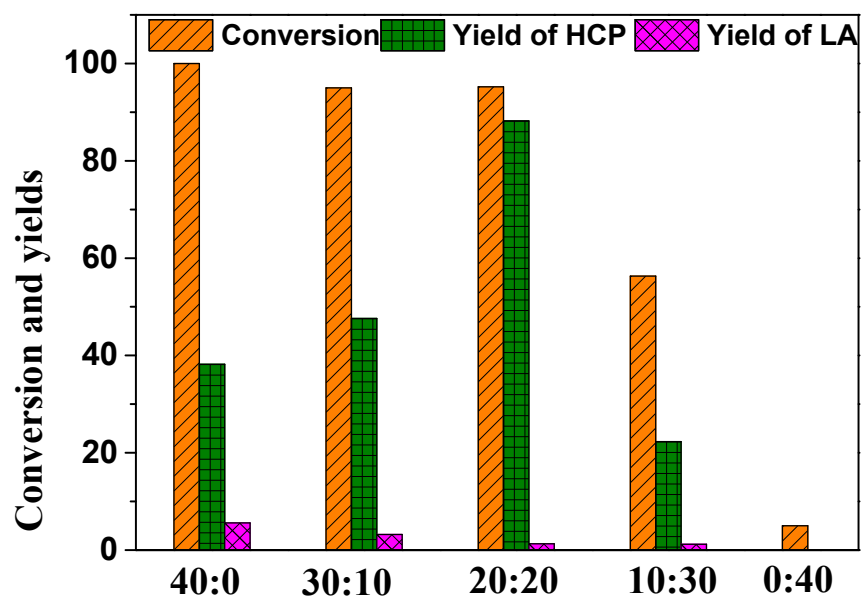

**Figure S7.** Effect of volume ratio of water/n-hexane on FA conversion and product yield over FeZn-P. Reaction conditions: FA (10.2 mmol), catalyst 0.1 g, temperature 150 °C, 4.0 MPa N<sub>2</sub> pressure, time 6 h.



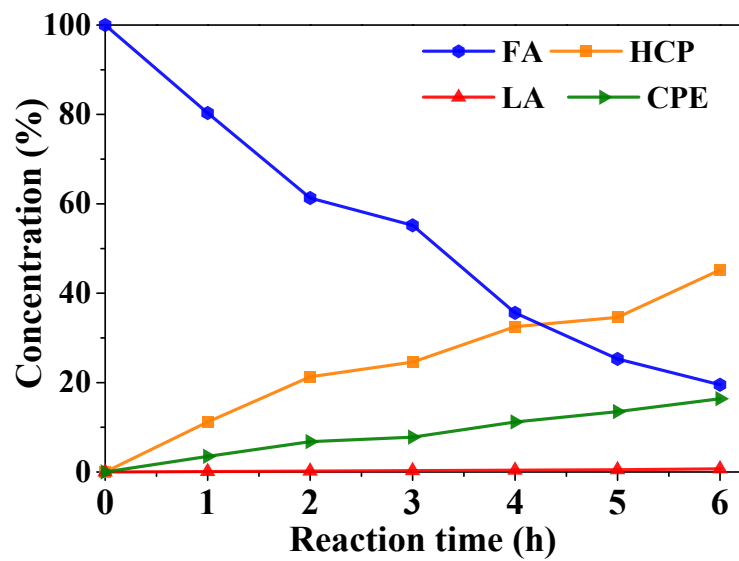

**Figure S8.** Time-dependent product distribution using FeZn-P, Reaction conditions:

FA (10.2 mmol), catalyst (0.1 g), water (40 mL), 150 °C, 2.0 MPa H<sub>2</sub> pressure.

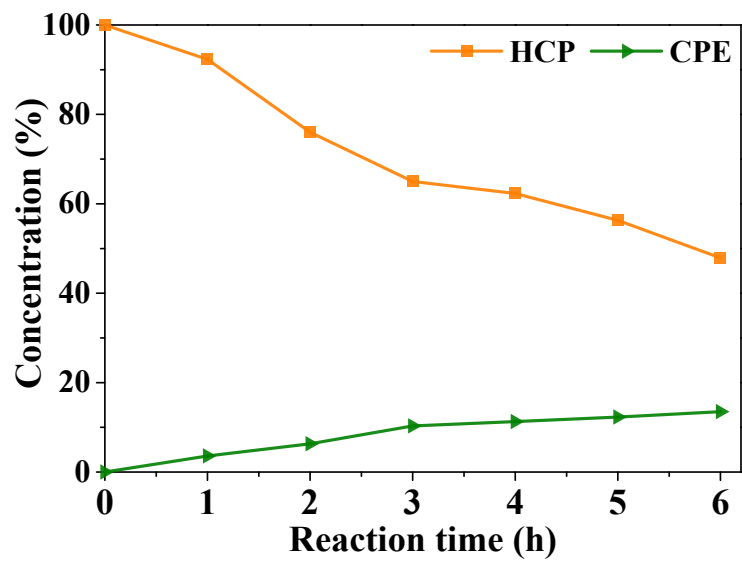

**Figure S9.** Time-dependent product distribution using FeZn-P. Reaction conditions:

HCP (10.2 mmol), catalyst (0.1 g), water (40 mL), 150 °C, 2.0 MPa H<sub>2</sub> pressure.

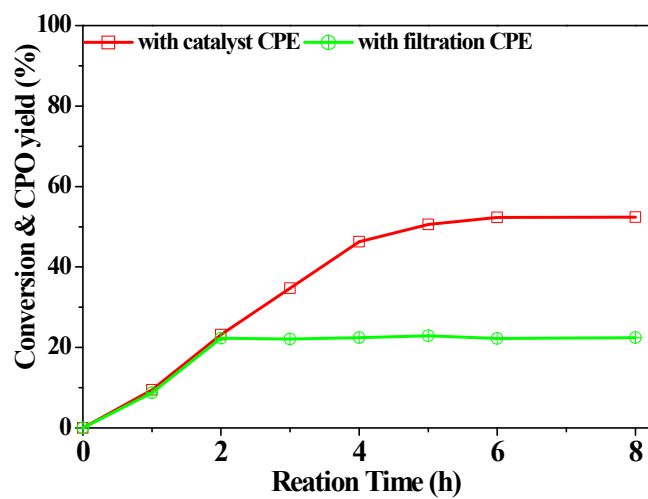

**Figure S10.** Fast hot catalyst filtration test in FA hydrogenative rearrangement using FeZn-P. Reaction conditions: FA (10.4 mmol), FeZn-P (0.1 g), water (40 mL), 4.0 MPa H<sub>2</sub>, temperature 150 °C.

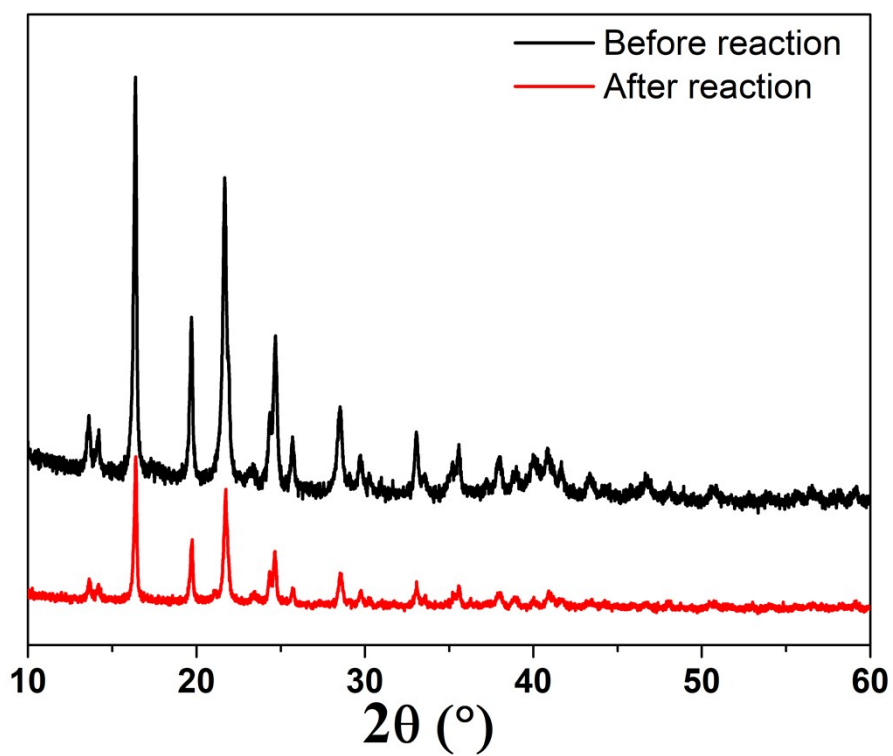

**Figure S11.** XRD diffraction patterns of FeZn-P before and after five catalytic runs.

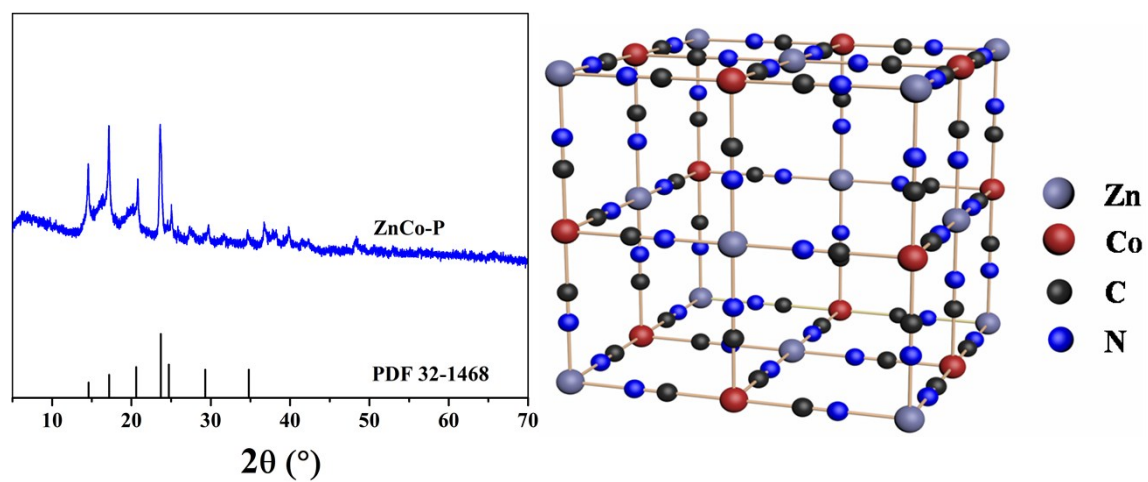

**Figure S12.** X-ray diffraction patterns and crystal structure of ZnCo-DMC.

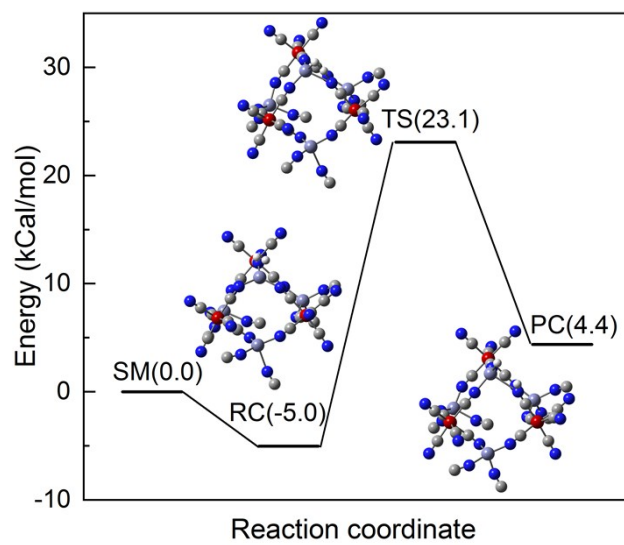

**Figure S13.** DFT calculated reaction free energies of H<sub>2</sub> heterolysis on tri-coordinative Zn<sup>2+</sup> site (Zn(N)<sub>3</sub>).

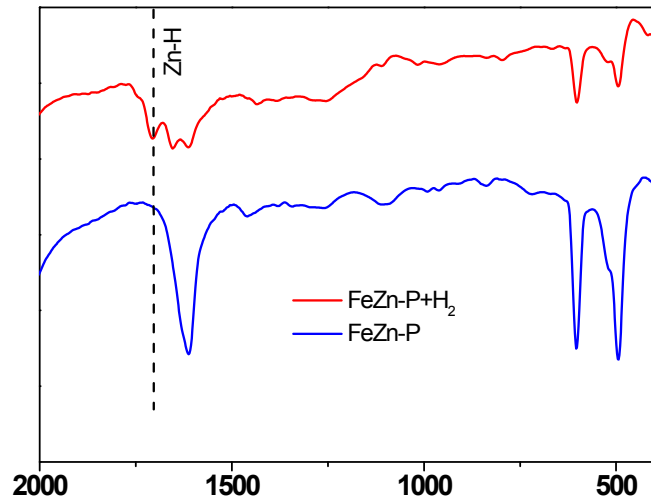

**Figure S14.** The FTIR spectra of the FeZn-P and H<sub>2</sub>-activated FeZn-P.

**Table S1.** Catalytic performance of DMC with HCP as a reactant. Reaction conditions: HCP (10.2 mmol), catalyst 0.1 g, reaction temperature 150 °C, time 6 h.

| Catalyst | H <sub>2</sub> pressure (MPa) | Conversion (%) | Yield of CPE (%) |
|----------|-------------------------------|----------------|------------------|
| -        | 4.0                           | -              | -                |
| FeZn     | 4.0                           | 56.8           | 17.6             |
| ZnCo-P   | 4.0                           | 54.2           | 16.5             |
| FeZn-P   | 2.0                           | 52.1           | 13.5             |
| FeZn-P   | 3.0                           | 53.3           | 16.8             |
| FeZn-P   | 4.0                           | 61.4           | 38.3             |
| FeZn-P   | 5.0                           | 68.4           | 41.2             |
| FeZn-P   | 6.0                           | 73.6           | 53.9             |
| FeZn-P   | 7.0                           | 72.9           | 53.2             |

**Table S2.** Physicochemical properties of catalysts. <sup>a</sup> represents the recycled sample

| Samples             | S <sub>BET</sub> (m <sup>2</sup> /g) | V <sub>total</sub> (cm <sup>3</sup> /g) |
|---------------------|--------------------------------------|-----------------------------------------|
| FeZn-P              | 42.6                                 | 0.068                                   |
| FeZn-P <sup>a</sup> | 28.6                                 | 0.048                                   |
